# Supplementary material
Source: PubMed Central journal article supplement (PMC1805522)

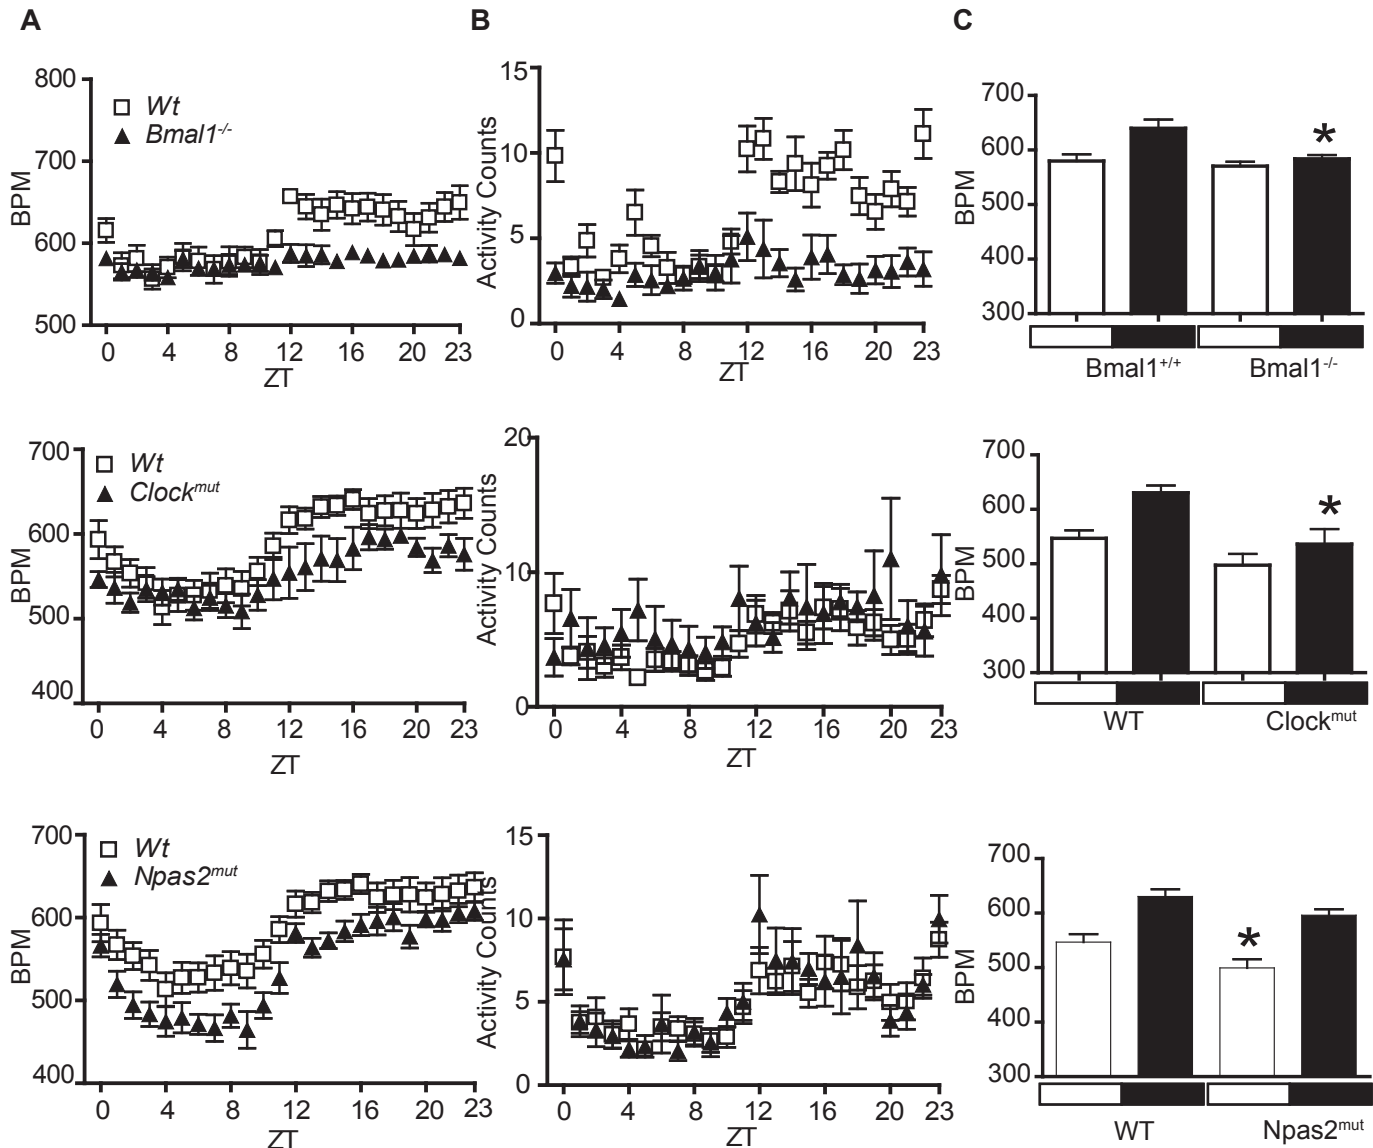

Supplement: pnas_0611680104_1.pdf [file pnas_0611680104_1.pdf]

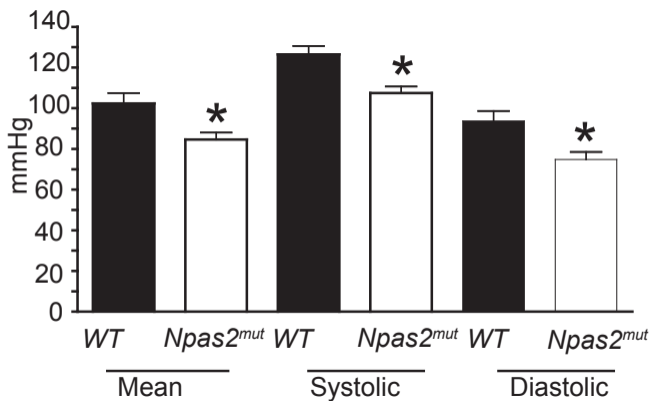

Supplement: pnas_0611680104_2.pdf [file pnas_0611680104_2.pdf]

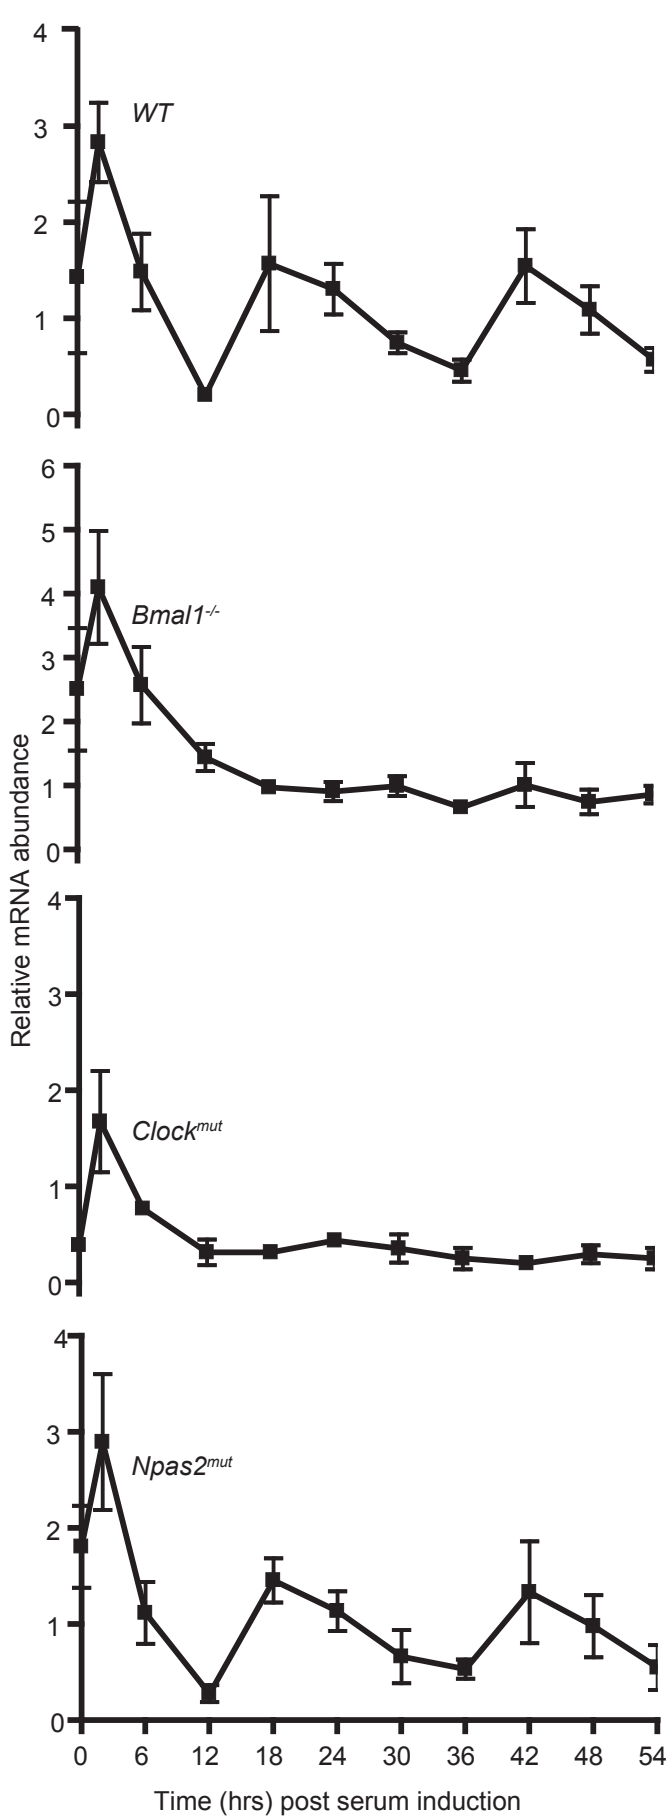

Supplement: pnas_0611680104_3.pdf [file pnas_0611680104_3.pdf]

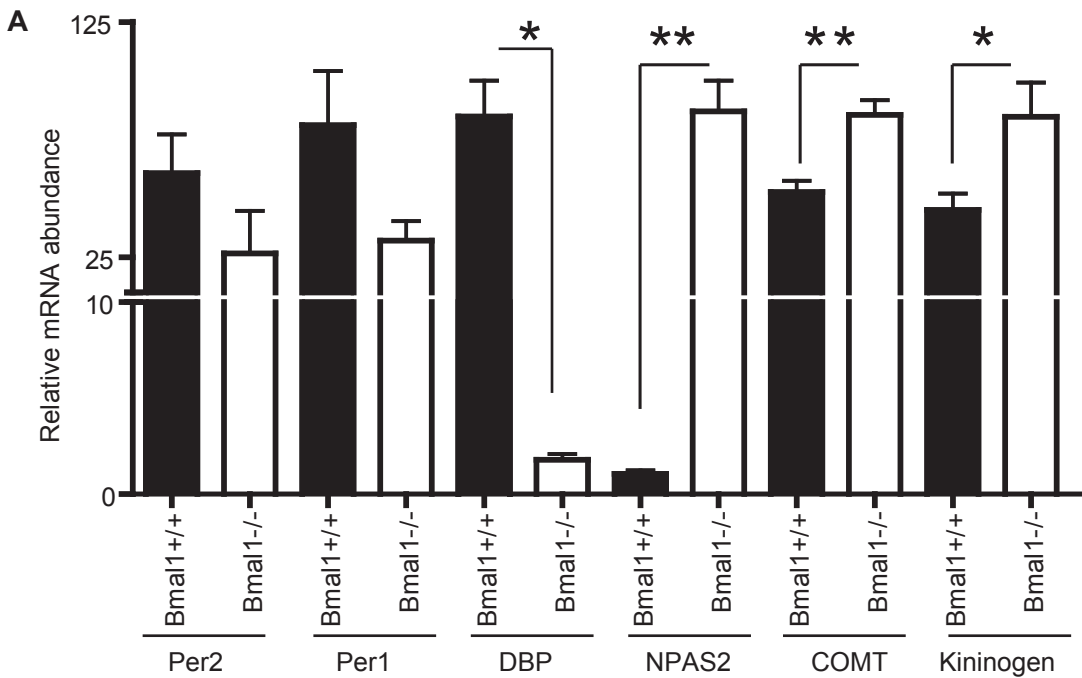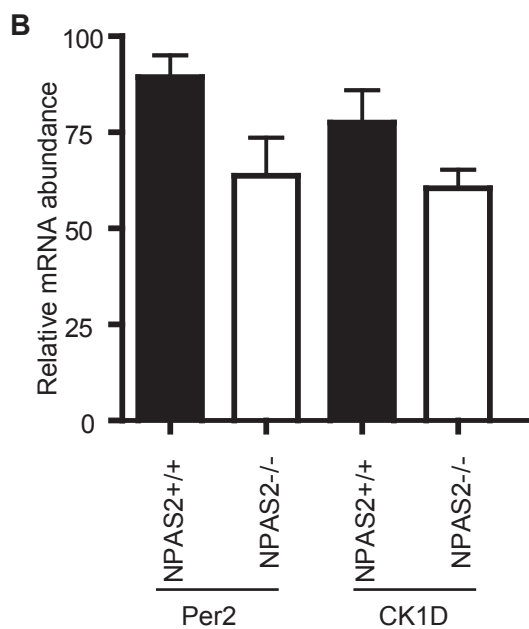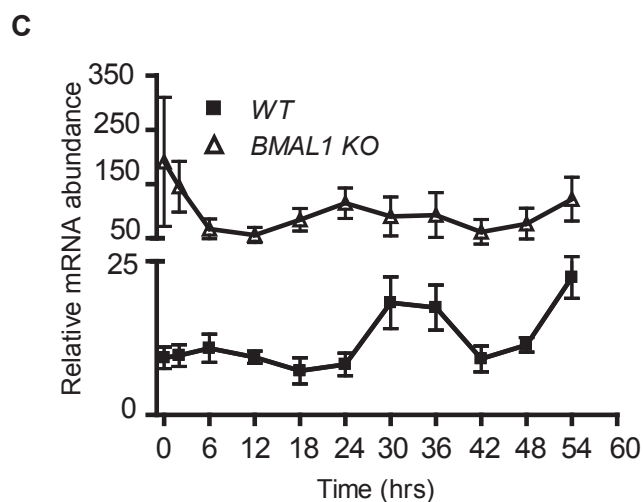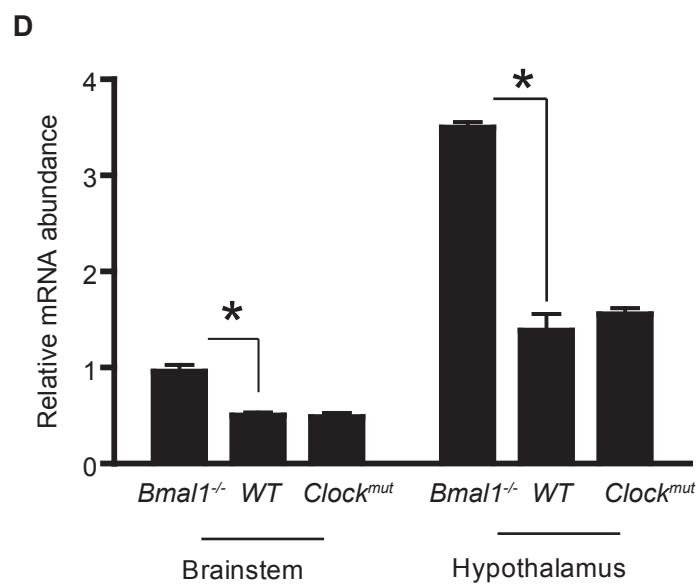

Supplement: pnas_0611680104_4.pdf [file pnas_0611680104_4.pdf]

**A**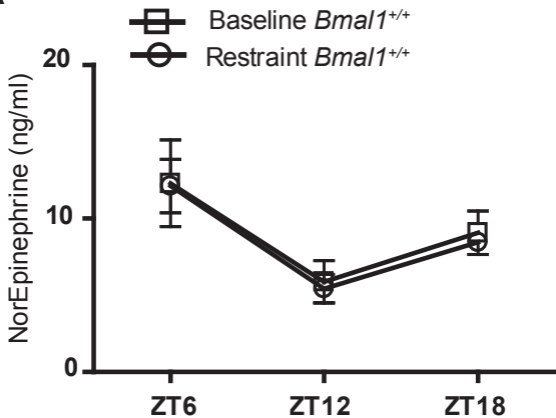**B**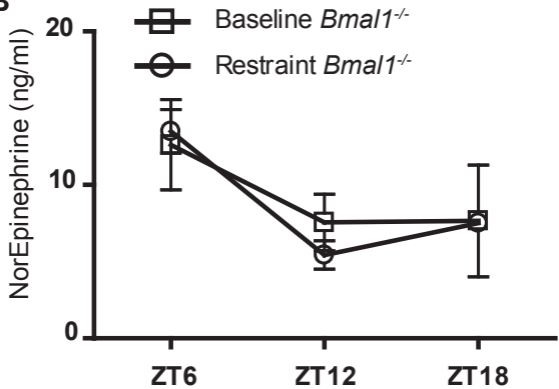

Supplement: pnas_0611680104_5.pdf [file pnas_0611680104_5.pdf]
